# Supplementary material
Source: PubMed Central journal article supplement (PMC5462013)
Supplement: supp_pp.16.00074_PP2016-01800DR1_Supplemental_Material.pdf [file supp_pp.16.00074_PP2016-01800DR1_Supplemental_Material.pdf]

---

1 **SUPPLEMENTAL MATERIALS**

2 **Supplemental Figure S1.** Deletion analysis in the *Gmilpa1* mutant.

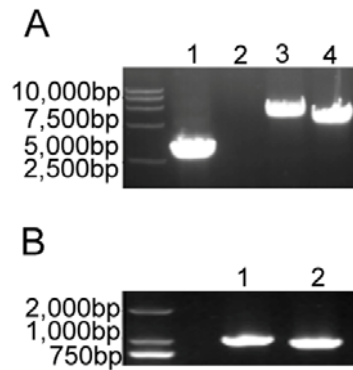

3

4 **(A)** PCR analysis of the deletion in the *Gmilpa1* mutant. Lanes 1 and 2 were PCR products  
5 amplified using primers OL4274&OL4277 (within the deletion) in Hedou 12 and the  
6 *Gmilpa1* mutant; lanes 3 and 4 were PCR products amplified using primers  
7 OL4274&OL4237 (outside of the deletion) in Hedou 12 and the *Gmilpa1* mutant.

8 **(B)** Transcript analysis of *GmILPA1* and *Gmilpa1* using primers OL4352&OL1250 in Hedou  
9 12 (lane 1) and the *Gmilpa1* mutant (lane 2).

10

11 **Supplemental Figure S2. Identification of transgenic plants.**

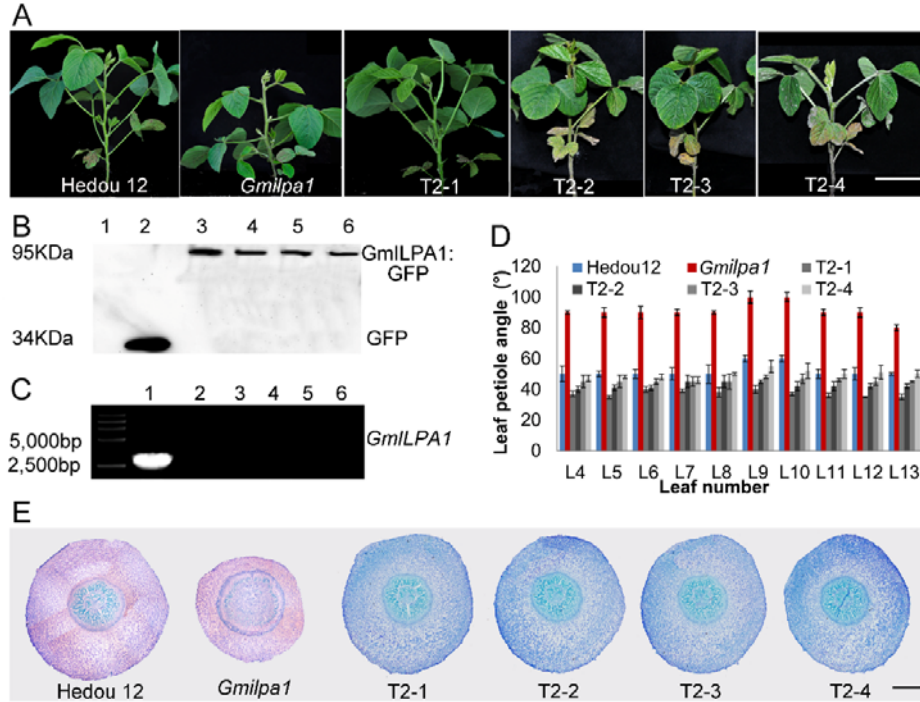

12

13 **(A)** Hedou 12, the *Gmilpa1* mutant and T<sub>2</sub> plants of four transformation events with the  
14 *GmILPA1* transgene at the V7 stage. Scale bar, 10 cm.

15 **(B)** Immunodetection of GFP levels in the *Gmilpa1* mutant (lane 1), *Pro35S:GFP* transgenic  
16 plants (lane 2), and *Gmilpa1* T<sub>2</sub> plants with the *GmILPA1-GFP* transgene (lane 3 to lane 6).

17 **(C)** PCR analysis of genomic *GmILPA1* using primers OL4274&OL4277 (within the deletion)  
18 in Hedou 12 (lane 1), the *Gmilpa1* mutant (lane 2) and *Gmilpa1* T<sub>2</sub> plants with the  
19 *GmILPA1-GFP* transgene (lane 3 to lane 6). OL4277 located in the 3' UTR region of  
20 *Glyma.11G026400.1* (which was not included in the transgene).

21 **(D)** LPAs of the 4th to 13th leaf of Hedou 12, the *Gmilpa1* mutant and four transformation  
22 event plants. LPAs are shown as averages  $\pm$  standard errors of the means from 12 different  
23 plants.

24 **(E)** Anatomical structure of the pulvini of 6-week-old Hedou 12, the *Gmilpa1* mutant and  
25 four transformation event plants. Scale bar, 400  $\mu$ m.

26

27

28 **Supplemental Figure S3.** Phylogeny analysis of APC8-like proteins.

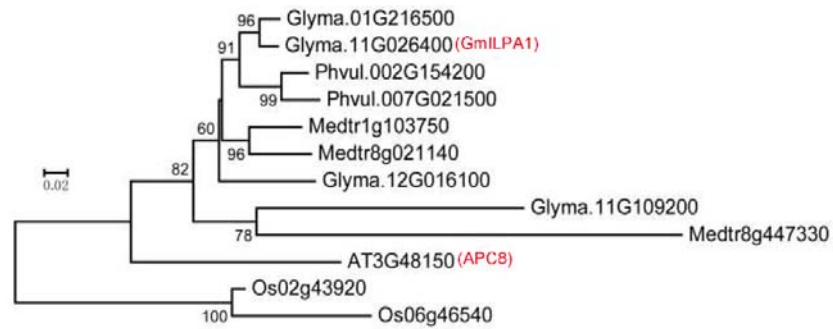

29

30 Neighbor-joining phylogenetic tree of APC8-like proteins. One homologous gene in  
31 *Arabidopsis*: *At3G48150*; two homologous genes in *O. sativa*: *Os02g43920* and *Os06g46540*;  
32 two homologous genes in *P. vulgaris*: *Phvul002G154200* and *Phvul007G021500*; three  
33 homologous genes in *M. truncatula*: *Medtr8g447330*, *Medtr8g021140* and *Medtr1g103750*;  
34 four homologous genes in *Glycine max*: *Glyma.01G216500*, *Glyma.11G026400*,  
35 *Glyma.11G109200*, *Glyma.12G016100*. Branches with bootstrap support 1000 replicates.

36

37 **Supplemental Figure S4.** Phenotypes of *Arabidopsis* wild type (Col-0), the *apc8* mutant,  
38 and the *35S:GmILPA1* T2 transgenic plants in the *apc8* background.

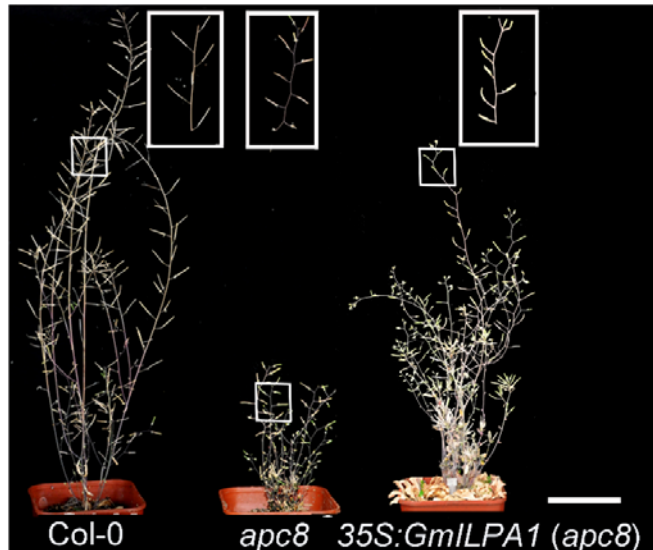

39

40 Scale bar, 5 cm. Boxes in the top right corner illustrate part of plants magnified 2X.

41

42

43 **Supplemental Figure S5.** Phylogeny analysis of APC13-like proteins and expression  
44 patterns of *GmAPC13a* and *GmAPC13b*.

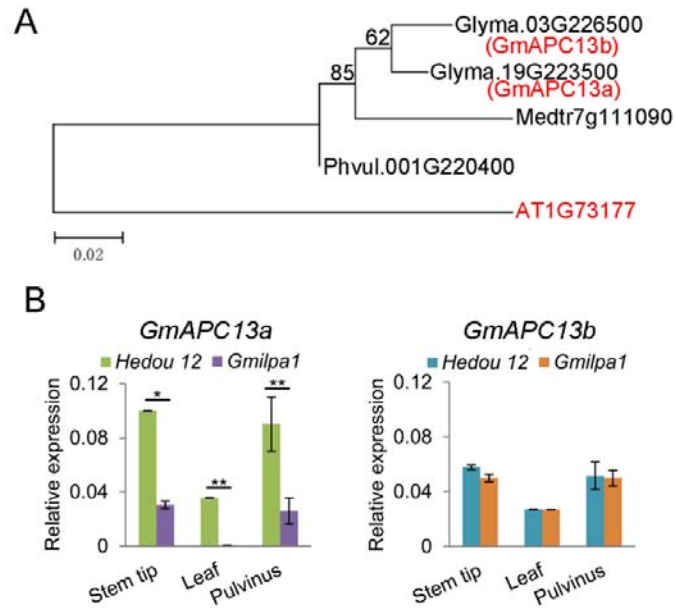

45  
46 **(A)** Neighbor-joining phylogenetic tree of APC13-like proteins. Branches with bootstrap  
47 support 1000 replicates.

48 **(B)** Expression levels of *GmAPC13a* and *GmAPC13b* in apical stem tips, leaves, and pulvini  
49 at the V5 stage in Hedou 12 and the *Gmilpa1* mutant. Expression levels are shown as means  
50  $\pm$  standard errors of the means from four biological replicates. \*\*P < 0.01, \*P < 0.05 (t-test).

51 **Supplemental Figure S6.** Leaflet nyctinastic movement in Hedou 12 and the *Gmilpa1*  
52 mutant.

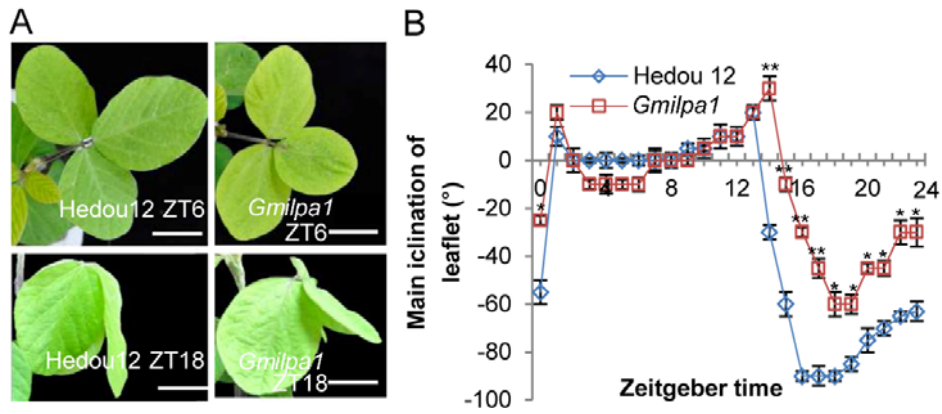

53  
54 **(A)** Trifoliate leaves of Hedou 12 and the *Gmilpa1* mutant at ZT6 and ZT18. Scale bars, 1.5  
55 cm. ZT, Zeitgeber time.  
56 **(B)** Nyctinastic movement of leaflets in Hedou 12 and the *Gmilpa1* mutant. Angles are  
57 shown as means  $\pm$  standard errors of the means from 12 different plants. \*\*P < 0.01, \*P < 0.05  
58 (t-test).

59 **Supplemental Figure S7.** Anatomical structure of the pulvinulus in Hedou 12 and the  
60 *Gmilpa1* mutant.

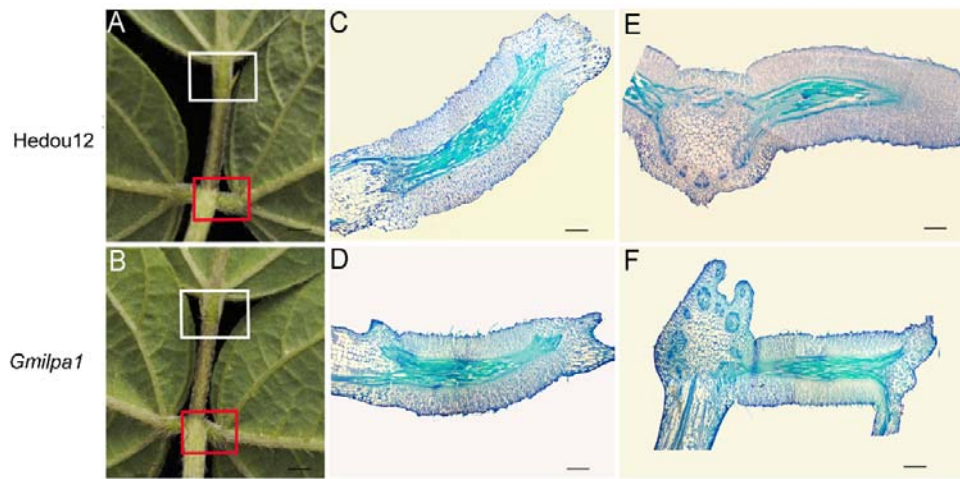

61  
62 **(A)** and **(B)** Pulvinulus on the inverse of leaves in 6-week-old Hedou 12 and the *Gmilpa1*  
63 mutant, respectively. Scale bars, 6 mm.

64 **(C)** and **(D)** Longitudinal section of the middle pulvinulus (in white boxes of A and B) in  
65 Hedou 12 and the *Gmilpa1* mutant, respectively. Scale bars, 500  $\mu\text{m}$ .

66 **(E)** and **(F)** Longitudinal section of the lateral pulvinulus (in red boxes of A and B) in Hedou  
67 12 and the *Gmilpa1* mutant, respectively. Scale bars, 500  $\mu\text{m}$ .

68 The pulvinulus of the *Gmilpa1* mutant (D and F) was smaller than that of Hedou 12 (C and E),  
69 in particular, there were fewer and smaller motor cells in the *Gmilpa1* mutant than in Hedou  
70 12.

**Supplemental Table S1. Primers used in this study.**

| Primers | Illustration          | Locus                  | Forward sequence 5'→3'<br>Reverse sequence 5'→3'                     |
|---------|-----------------------|------------------------|----------------------------------------------------------------------|
| MOL1397 | Marker                | Chr11: 1696485         | GCTTTGGTTCGGAGGTTTG<br>GATAGCTGACGGAGGTCAAGAG                        |
| MOL1439 | Marker                | Chr11: 1726926         | CGAAGGAGACACATATATAATACCAGTCGA<br>GGCCTGGAGATTCTGGCATT               |
| MOL1435 | Marker                | Chr11: 1738185         | TTAGTAGCTTTGGTGTGGCAATCGA<br>CCAATGCCTTTGTGGAACCTTACT                |
| MOL0257 | Marker                | Chr11: 1741407         | CCACGATTATAAATAGCAGACAGGATC<br>GACCCTCACCGTTGGGAAGC                  |
| MOL2385 | Marker                | Chr11: 1781926         | TCTTACTTTGTAGAGGTCGGTGG<br>GTAGTAATATGGTAATTCTCTTAACCCTAA            |
| MOL2387 | Marker                | Chr11: 1874988         | TGATTTCCGGCCATCAAAG<br>AACACATACCTTTATTTCTACGATG                     |
| MOL1233 | Marker                | Chr11: 1899870         | CGAGCATCATTGTAGATTTGTAGTG<br>GCGACTATCATTTTATCCTACGTGA               |
| OL4274  | Deletion test         | <i>Glyma.11G026400</i> | CTTCATTGGCGGGCTACAT<br>-                                             |
| OL4277  | Deletion test         | <i>Glyma.11G026400</i> | -<br>GATAAGAATTCACCTAATAACGCTTC                                      |
| OL4237  | Deletion test         | <i>Glyma.11G026400</i> | -<br>GCCGAAAGCATCCAGAAGTC                                            |
| OL4234  | 3'RACE                | <i>Glyma.11G026400</i> | AGTGTAGCCGAAGGCAATGAG<br>-                                           |
| OL1249  | 3'RACE                | <i>Glyma.11G026400</i> | -<br>GACCACGCGTATCGATGTCGACTTTTTTTTTTTTTTTTTV                        |
| OL4352  | 3'RACE                | <i>Glyma.11G026400</i> | GGAAGGACCTAAAATGGTTGAGGCT<br>-                                       |
| OL1250  | 3'RACE                | <i>Glyma.11G026400</i> | -<br>GACCACGCGTATCGATGTCGAC                                          |
| OL4735  | q RT-PCR              | <i>Glyma.11G026400</i> | TTATCGGCTTGGACACTTATGG<br>GCGGGTCTTCGCACAATC                         |
| OL4738  | q RT-PCR              | <i>Glyma.11G026500</i> | CGTCGTTCCCTGGCGTCAT<br>AATCACGTGGGTCTATATCTACTGC                     |
| OL6555  | q RT-PCR              | <i>Glyma.11G026600</i> | GCCTAGCAGCCCATCAGTT<br>GCCATTCCCTTATCTTTCCAT                         |
| OL6553  | <i>Cons4</i>          | <i>Glyma.12G020500</i> | GATCAGCAATTATGCACAACG<br>CCGCCACCATTTCAGATTATGT                      |
| OL4391  | <i>GmILPA1</i><br>CDS | <i>Glyma.11G026400</i> | CGAGCTCATGAGTTCCAAAGAGAGT<br>CACCATGGTGGCGACCGGTGGGGGAGGAAAATGCTCAAC |
| OL4392  | <i>GFP</i> CDS        | -                      | CTCCCCACCGGTCGCCACCATGGTGAGCAAGGGCGAG                                |

|                  |                                     |                               | TCCCCGGGTTACTTGTACAGCTCGTC                              |
|------------------|-------------------------------------|-------------------------------|---------------------------------------------------------|
| OL4401           | Probe                               | <i>Glyma.11G026400</i>        | GAATCTGAAGAAAGGGAAGGACC<br>ACATGTGGATTAAGATCGAAGTGC     |
| OL5984           | q RT-PCR<br><i>GmAPC13a</i>         | <i>Glyma.19G223500</i>        | GGCAGAACTGAGTTTGGGAATT<br>TTGTTGCGTCTCCTGATTTGA         |
| OL6556           | q RT-PCR<br><i>GmAPC13b</i>         | <i>Glyma.03G226500</i>        | CAGTTTGTATTACCAACGTTA<br>CTCAAAGTAAGAGGTTTCAAATTAT      |
| OL4506           | <i>GmILPA1</i><br>for pColdTF       | <i>Glyma.11G026400</i>        | CGCATATGATGAGTTCCAAAGAGAG<br>CGAGCTCGGGAGGAAAATGCTC     |
| OL4507           | <i>Gmilpa1</i> for<br>pColdTF       | <i>Glyma.11G026400-<br/>m</i> | CGCATATGATGAGTTCCAAAGAGAG<br>GTCGACACTAACCTGTTTCAAAT    |
| OL4535           | <i>GmAPC13a</i><br>for<br>pGEX-4T-3 | <i>Glyma.19G223500</i>        | ACCCGGGATGGCAGAACTGAGT<br>GGTCGACTTCTTGACCAAAGGCAAG     |
| pGWC-<br>GmAPC8a | <i>GmILPA1</i><br>for pGWC          | <i>Glyma.11G026400</i>        | ATGAGTTCCAAAGAGAGTTGCAGAAG<br>GCGGGAGGAAAATGCTCAACAT    |
| pGWC-<br>Gmapc8a | <i>Gmilpa1</i> for<br>pGWC          | -                             | ATGAGTTCCAAAGAGAGTTGCAGAAG<br>GCACTAACCTGTTTCAAATCGAAAG |
| pGWC-<br>APC13a  | <i>GmAPC13a</i><br>for pGWC         | <i>Glyma.19G223500</i>        | ATGGCAGAACTGAGTTTGGGAATT<br>GCTTCTTGACCAAAGGCAAGATC     |

72
